# Supplementary material for: Methods for Indirect Treatment Comparison: Results from a Systematic Literature Review
Source: MDPI journal article supplement (doi:10.3390/jmahp12020006), 2024-04-16
Supplement: s1 [file s1]

**Table S1.** PICO eligibility criteria.

| Criteria                  | Include                                                                                                               | Exclude                                                                                                                                                                                                                                                                |
|---------------------------|-----------------------------------------------------------------------------------------------------------------------|------------------------------------------------------------------------------------------------------------------------------------------------------------------------------------------------------------------------------------------------------------------------|
| Population                | -                                                                                                                     | Animals/in vitro data                                                                                                                                                                                                                                                  |
| Intervention / Comparator | No restrictions, any comparator will be included                                                                      | -                                                                                                                                                                                                                                                                      |
| Outcomes                  | No restrictions, any outcome will be included                                                                         | -                                                                                                                                                                                                                                                                      |
| Study design / setting    | <ul style="list-style-type: none"> <li>Methodology papers</li> <li>Studies</li> <li>Reviews</li> </ul>                | <ul style="list-style-type: none"> <li>Animal / in-vitro studies</li> <li>PK/PD studies</li> <li>Cost studies (cost-effectiveness, budget impact analyses)</li> <li>Studies describing the application of ITC methods in the context of specific treatments</li> </ul> |
| Language of publication   | English language publications                                                                                         | Non-English language publications without an English abstract                                                                                                                                                                                                          |
| Date of publication       | <ul style="list-style-type: none"> <li>Full publications: from 1997</li> <li>Hand-searched: Not restricted</li> </ul> | -                                                                                                                                                                                                                                                                      |
| Countries                 | No restriction                                                                                                        | -                                                                                                                                                                                                                                                                      |

**Abbreviations:** ITC: indirect treatment comparison; PD: pharmacodynamic; PICO: patient/population, intervention, comparison, outcome; PK: pharmacokinetic..

**Table S2.** Search via Embase.com (15 November 2021).

| Concept | Search no. | Query                                                                                                        | Results |
|---------|------------|--------------------------------------------------------------------------------------------------------------|---------|
| Journal | #1         | 'british medical journal':jt                                                                                 | 96,300  |
| Journal | #2         | 'the bmj':jt                                                                                                 | 4,340   |
| Journal | #3         | 'statistics in medicine':jt                                                                                  | 10,061  |
| Journal | #4         | 'journal of the royal statistical society':jt                                                                | 50      |
| Journal | #5         | 'journal of the royal statistical society, series a' OR 'journal of the royal statistical society: series a' | 44      |
| Journal | #6         | 'journal of the royal statistical society, series b' OR 'journal of the royal statistical society: series b' | 69      |
| Journal | #7         | 'j. r. stat. soc.' OR 'j r stat soc'                                                                         | 96      |
| Journal | #8         | 'journal of comparative effectiveness research':jt                                                           | 917     |
| Journal | #9         | 'international journal of technology assessment in health care':jt                                           | 3,352   |
| Journal | #10        | 'pharmacoeconomics':jt                                                                                       | 5,937   |
| Journal | #11        | 'journal of clinical epidemiology':jt                                                                        | 7,119   |
| Journal | #12        | 'statistical methods in medical research':jt                                                                 | 2,099   |
| Journal | #13        | 'medical decision making':jt                                                                                 | 2,759   |
| Journal | #14        | 'journal of the american statistical association':jt                                                         | 124     |
| Journal | #15        | 'j. amer. statist. assoc.' OR 'j amer statist assoc' OR 'j. am. stat. as-soc.' OR 'j am stat assoc'          | 202     |
| Journal | #16        | 'bmc medical research methodology':jt                                                                        | 2,647   |
| Journal | #17        | 'value in health':jt                                                                                         | 50,035  |
| Journal | #18        | 'journal of clinical epidemiology':jt                                                                        | 7,119   |
| Journal | #19        | 'journal of biopharmaceutical statistics':jt                                                                 | 1,884   |
| Journal | #20        | 'biostatistics':jt                                                                                           | 1,766   |
| Journal | #21        | 'pharmaceutical statistics':jt                                                                               | 1,038   |
| Journal | #22        | 'research synthesis methods':jt                                                                              | 384     |

|                                                                                           |     |                                                                                                                                                                                                                                                                                                                                                                                                                                                                                                                          |         |
|-------------------------------------------------------------------------------------------|-----|--------------------------------------------------------------------------------------------------------------------------------------------------------------------------------------------------------------------------------------------------------------------------------------------------------------------------------------------------------------------------------------------------------------------------------------------------------------------------------------------------------------------------|---------|
| Journals – combined search                                                                | #23 | #1 OR #2 OR #3 OR #4 OR #5 OR #6 OR #7 OR #8 OR #9 OR #10<br>OR #11 OR #12 OR #13 OR #14 OR #15 OR #16 OR #17 OR #18<br>OR #19 OR #20 OR #21 OR #22                                                                                                                                                                                                                                                                                                                                                                      | 190,941 |
| Author                                                                                    | #24 | 'abrams k':au                                                                                                                                                                                                                                                                                                                                                                                                                                                                                                            | 608     |
| Author                                                                                    | #25 | 'ades a':au                                                                                                                                                                                                                                                                                                                                                                                                                                                                                                              | 364     |
| Author                                                                                    | #26 | 'bucher h':au                                                                                                                                                                                                                                                                                                                                                                                                                                                                                                            | 967     |
| Author                                                                                    | #27 | 'bujkiewicz s':au                                                                                                                                                                                                                                                                                                                                                                                                                                                                                                        | 53      |
| Author                                                                                    | #28 | 'caldwell d':au                                                                                                                                                                                                                                                                                                                                                                                                                                                                                                          | 750     |
| Author                                                                                    | #29 | 'dias s':au                                                                                                                                                                                                                                                                                                                                                                                                                                                                                                              | 1,109   |
| Author                                                                                    | #30 | 'efthimiou o':au                                                                                                                                                                                                                                                                                                                                                                                                                                                                                                         | 65      |
| Author                                                                                    | #31 | 'higgins j':au                                                                                                                                                                                                                                                                                                                                                                                                                                                                                                           | 2,710   |
| Author                                                                                    | #32 | 'phillippo d':au                                                                                                                                                                                                                                                                                                                                                                                                                                                                                                         | 12      |
| Author                                                                                    | #33 | 'salanti g':au                                                                                                                                                                                                                                                                                                                                                                                                                                                                                                           | 232     |
| Author                                                                                    | #34 | 'signorovitch j':au                                                                                                                                                                                                                                                                                                                                                                                                                                                                                                      | 380     |
| Author                                                                                    | #35 | 'song f':au                                                                                                                                                                                                                                                                                                                                                                                                                                                                                                              | 3,268   |
| Author                                                                                    | #36 | 'sutton a':au                                                                                                                                                                                                                                                                                                                                                                                                                                                                                                            | 1,207   |
| Author                                                                                    | #37 | 'swallow e':au                                                                                                                                                                                                                                                                                                                                                                                                                                                                                                           | 174     |
| Author                                                                                    | #38 | 'welton n':au                                                                                                                                                                                                                                                                                                                                                                                                                                                                                                            | 236     |
| Authors – combined                                                                        | #39 | #24 OR #25 OR #26 OR #27 OR #28 OR #29 OR #30 OR #31 OR<br>#32 OR #33 OR #34 OR #35 OR #36 OR #37 OR #38                                                                                                                                                                                                                                                                                                                                                                                                                 | 11,590  |
| Network meta-analysis                                                                     | #40 | 'network meta-analysis'/exp                                                                                                                                                                                                                                                                                                                                                                                                                                                                                              | 4,765   |
| Indirect treatment comparison/meta-analysis                                               | #41 | ((('meta analysis'/exp OR 'meta analys\$s' OR 'meta-analys\$s')<br>AND (indirect OR indirectly OR 'cross-stud*' OR 'cross-trial\$'<br>OR 'multiple treatment\$' OR 'mixed treatment\$' OR 'multiple<br>comparison\$'))                                                                                                                                                                                                                                                                                                   | 7,053   |
| Indirect treatment comparison/meta-analysis                                               | #42 | 'indirect treatment comparison\$' OR 'indirect-treatment-compar-<br>ison\$' OR 'adjusted indirect comparison\$' OR 'nondirect com-<br>parison\$' OR 'non-direct comparison\$' OR 'maic' OR 'matching<br>adjusted indirect comparison\$' OR 'matching-adjusted indirect<br>comparison\$' OR 'matched adjusted indirect comparison\$' OR<br>'network metaanalys\$s' OR 'network meta-analys\$s' OR 'indirect<br>comparison\$' OR (indirect NEAR/2 compar*) OR 'itc' OR 'nma'<br>OR 'network meta-regression\$' OR 'ml-nmr' | 27,251  |
| Indirect treatment comparison/meta-analysis/network meta-analysis/network meta-regression | #43 | #40 OR #41 OR #42                                                                                                                                                                                                                                                                                                                                                                                                                                                                                                        | 30,614  |
| Authors or journals of interest                                                           | #44 | #23 OR #39                                                                                                                                                                                                                                                                                                                                                                                                                                                                                                               | 201,886 |
| Authors or journals of interest, and on methodology of interest                           | #45 | #43 AND #44                                                                                                                                                                                                                                                                                                                                                                                                                                                                                                              | 2,788   |
| Limit to studies published from 1997 onwards                                              | #46 | #45 AND [1997-2021]/py                                                                                                                                                                                                                                                                                                                                                                                                                                                                                                   | 2,782   |
| Limit to published articles, articles in press and reviews published from 1997 onwards    | #47 | #46 AND ('article'/it OR 'article in press'/it OR 'review'/it)                                                                                                                                                                                                                                                                                                                                                                                                                                                           | 897     |

**Table S3.** PubMed search via <https://pubmed.ncbi.nlm.nih.gov/> (15 November 2021).

| Concept                                     | Search no. | Query                                                                                                                                  | Results |
|---------------------------------------------|------------|----------------------------------------------------------------------------------------------------------------------------------------|---------|
| Journal                                     | #1         | british medical journal [ta]                                                                                                           | 195,866 |
| Journal                                     | #2         | "the bmj"                                                                                                                              | 4,544   |
| Journal                                     | #3         | statistics in medicine [ta]                                                                                                            | 9,634   |
| Journal                                     | #4         | journal of the royal statistical society [ta]                                                                                          | 255     |
| Journal                                     | #5         | "journal of the royal statistical society, series a" OR "journal of the royal statistical society: series a"                           | 8       |
| Journal                                     | #6         | "journal of the royal statistical society, series b" OR "journal of the royal statistical society: series b"                           | 155     |
| Journal                                     | #7         | "j. r. stat. soc." OR "j r stat soc"                                                                                                   | 416     |
| Journal                                     | #8         | journal of comparative effectiveness research [ta]                                                                                     | 920     |
| Journal                                     | #9         | international journal of technology assessment in health care [ta]                                                                     | 2,637   |
| Journal                                     | #10        | pharmacoeconomics [ta]                                                                                                                 | 3,405   |
| Journal                                     | #11        | journal of clinical epidemiology [ta]                                                                                                  | 6,923   |
| Journal                                     | #12        | statistical methods in medical research [ta]                                                                                           | 1,996   |
| Journal                                     | #13        | medical decision making [ta]                                                                                                           | 2,688   |
| Journal                                     | #14        | journal of the american statistical association [ta]                                                                                   | 738     |
| Journal                                     | #15        | "j. amer. statist. assoc." OR "j amer statist assoc" OR "j. am. stat. assoc." OR "j am stat assoc"                                     | 798     |
| Journal                                     | #16        | bmc medical research methodology [ta]                                                                                                  | 2,606   |
| Journal                                     | #17        | value in health [ta]                                                                                                                   | 5,433   |
| Journal                                     | #18        | journal of biopharmaceutical statistics [ta]                                                                                           | 1,837   |
| Journal                                     | #19        | biostatistics [ta]                                                                                                                     | 1,223   |
| Journal                                     | #20        | pharmaceutical statistics [ta]                                                                                                         | 858     |
| Journal                                     | #21        | research synthesis methods [ta]                                                                                                        | 493     |
| Journals – combined search                  | #22        | #1 OR #2 OR #3 OR #4 OR #5 OR #6 OR #7 OR #8 OR #9 OR #10 OR #11 OR #12 OR #13 OR #14 OR #15 OR #16 OR #17 OR #18 OR #19 OR #20 OR #21 | 237,984 |
| Author                                      | #23        | abrams k [au]                                                                                                                          | 433     |
| Author                                      | #24        | ades a [au]                                                                                                                            | 324     |
| Author                                      | #25        | bucher h [au]                                                                                                                          | 627     |
| Author                                      | #26        | bujkiewicz s [au]                                                                                                                      | 33      |
| Author                                      | #27        | caldwell d [au]                                                                                                                        | 755     |
| Author                                      | #28        | dias s [au]                                                                                                                            | 754     |
| Author                                      | #29        | efthimiou o [au]                                                                                                                       | 59      |
| Author                                      | #30        | higgins j [au]                                                                                                                         | 2,164   |
| Author                                      | #31        | phillippo d [au]                                                                                                                       | 14      |
| Author                                      | #32        | salanti g [au]                                                                                                                         | 214     |
| Author                                      | #33        | signorovitch j [au]                                                                                                                    | 143     |
| Author                                      | #34        | song f [au]                                                                                                                            | 2,949   |
| Author                                      | #35        | sutton a [au]                                                                                                                          | 1,047   |
| Author                                      | #36        | swallow e [au]                                                                                                                         | 126     |
| Author                                      | #37        | welton n [au]                                                                                                                          | 199     |
| Authors – combined                          | #38        | #23 OR #24 OR #25 OR #26 OR #27 OR #28 OR #29 OR #30 OR #31 OR #32 OR #33 OR #34 OR #35 OR #36 OR #37                                  | 9,378   |
| Network meta-analysis                       | #39        | network meta-analysis [MeSH Terms]                                                                                                     | 2,992   |
| Indirect treatment comparison/meta-analysis | #40        | ((“meta analysis as topic”[MeSH Terms] OR “meta analysis” OR “meta analyses” OR “meta-analysis” OR “meta-analyses” OR                  | 4,464   |

|                                                                                                                              |     |                                                                                                                                                                                                                                                                                                                                                                                                                                                                                                                                                                                                                            |         |
|------------------------------------------------------------------------------------------------------------------------------|-----|----------------------------------------------------------------------------------------------------------------------------------------------------------------------------------------------------------------------------------------------------------------------------------------------------------------------------------------------------------------------------------------------------------------------------------------------------------------------------------------------------------------------------------------------------------------------------------------------------------------------------|---------|
|                                                                                                                              |     | metaanalysis OR metaanalyses) AND (indirect OR indirectly OR cross-stud* OR cross-trial OR "multiple treatment" OR "mixed treatment" OR "multiple comparison" OR indirect-comparison))                                                                                                                                                                                                                                                                                                                                                                                                                                     |         |
| Indirect treatment comparison/meta-analysis                                                                                  | #41 | "indirect treatment comparison*" OR "indirect-treatment-comparison*" OR "adjusted indirect comparison*" OR "nondirect comparison*" OR "non-direct comparison*" OR maic OR "matching adjusted indirect comparison*" OR "matching-adjusted indirect comparison*" OR "network meta analysis" OR "network meta analyses" OR "matched adjusted indirect comparison*" OR "network metaanalys*" OR "network meta-analys*" OR "network meta analysis" OR "indirect comparison*" OR (indirect AND compar*) OR itc OR itcs OR nma OR "network meta-regression*" OR "network meta regression*" OR "network metaregression*" OR ml-nmr | 83,320  |
| Indirect treatment comparison/meta-analysis/network meta-analysis/network meta-regression                                    | #42 | #39 OR #40 OR #41                                                                                                                                                                                                                                                                                                                                                                                                                                                                                                                                                                                                          | 84,828  |
| Authors or journals of interest                                                                                              | #43 | #22 OR #38                                                                                                                                                                                                                                                                                                                                                                                                                                                                                                                                                                                                                 | 246,826 |
| Authors or journals of interest, and on methodology of interest                                                              | #44 | #42 AND #43                                                                                                                                                                                                                                                                                                                                                                                                                                                                                                                                                                                                                | 1,305   |
| Limit to studies published from 1997 onwards                                                                                 | #45 | #44 AND 1997/01/01:2021/12/12[dp]                                                                                                                                                                                                                                                                                                                                                                                                                                                                                                                                                                                          | 1,239   |
| Limit to published journal articles, published from 1997 onwards                                                             | #46 | #44 AND 1997/01/01:2021/12/12[dp] Filters: Journal article                                                                                                                                                                                                                                                                                                                                                                                                                                                                                                                                                                 | 1,200   |
| Limit to reviews published from 1997 onwards                                                                                 | #47 | #44 AND 1997/01/01:2021/12/12[dp] Filters: Review                                                                                                                                                                                                                                                                                                                                                                                                                                                                                                                                                                          | 292     |
| Limit to technical reports published from 1997 onwards                                                                       | #48 | #44 AND 1997/01/01:2021/12/12[dp] Filters: Technical report                                                                                                                                                                                                                                                                                                                                                                                                                                                                                                                                                                | 1       |
| Limit to published journal articles, technical reports, and reviews published from 1997 onwards                              | #49 | #46 OR #47 OR #48                                                                                                                                                                                                                                                                                                                                                                                                                                                                                                                                                                                                          | 1,200   |
| Limit to studies published from 1997 onwards, added to PubMed in scope of MEDLINE, for which MeSH terms are not yet assigned | #50 | (#44 AND 1997/01/01:2021/12/12[dp]) AND inprocess[sb]                                                                                                                                                                                                                                                                                                                                                                                                                                                                                                                                                                      | 18      |
| Limit to reviews, technical reports, journal articles, PUBMED-IN-PROCESS articles published from 1997 onwards                | #51 | #49 OR #50                                                                                                                                                                                                                                                                                                                                                                                                                                                                                                                                                                                                                 | 1,201   |

**Footnote:** Combining the PubMed and Embase searches above, after de-duplication yields 1,397 records.

**Table S4.** List of pre-defined papers.

| No. | Reference                                                                                                                                                                                                                                                                                                                                                                                                                                                                   | Identified in Search? | ID no. (EndNote* or hand search) |
|-----|-----------------------------------------------------------------------------------------------------------------------------------------------------------------------------------------------------------------------------------------------------------------------------------------------------------------------------------------------------------------------------------------------------------------------------------------------------------------------------|-----------------------|----------------------------------|
| 1   | Welton, N. J. (2020). CHTE2020 SOURCES AND SYNTHESIS OF EVIDENCE; UPDATE TO EVIDENCE SYNTHESIS METHODS. CHTE2020 sources and synthesis of evidence   NICE Decision Support Unit   The University of Sheffield                                                                                                                                                                                                                                                               | Y                     | Hand search                      |
| 2   | Bucher HC, Guyatt GH, Griffith LE, Walter SD. The results of direct and indirect treatment comparisons in meta-analysis of randomized controlled trials. <i>J Clin Epidemiol</i> 1997; 50(6): 683-691.                                                                                                                                                                                                                                                                      | Y                     | 38                               |
| 3   | Bujkiewicz, S., Achana, F., Papanikos, T., Riley, R., & Abrams, K. (2019). NICE DSU Technical Support Document 20. Multivariate meta-analysis of summary data for combining treatment effects on correlated outcomes and evaluating surrogate endpoints. Full list of technical support documents (TSDs)   NICE Decision Support Unit   The University of Sheffield                                                                                                         | Y                     | Hand search                      |
| 4   | Dias, S., Welton, N.J., Sutton, A.J. & Ades, A.E. (2011). NICE DSU Technical Support Document 2. A General Linear Modelling Framework for Pairwise and Network Meta-Analysis of Randomised Controlled Trials. Full list of technical support documents (TSDs)   NICE Decision Support Unit   The University of Sheffield                                                                                                                                                    | Y                     | 155                              |
| 5   | Dias, S., Sutton, A. J., Welton, N. J., & Ades, A. E. (2016). NICE DSU Technical Support Document 3. Heterogeneity: subgroups, meta-regression, bias and bias-adjustment Full list of technical support documents (TSDs)   NICE Decision Support Unit   The University of Sheffield                                                                                                                                                                                         | Y                     | 137                              |
| 6   | Efthimiou, O., Mavridis, D., Debray, T. P., Samara, M., Belger, M., Siontis, G. C., ... & GetReal Work Package 4. (2017). Combining randomized and non-randomized evidence in network meta-analysis. <i>Statistics in medicine</i> , 36(8), 1210-1226.                                                                                                                                                                                                                      | Y                     | 345                              |
| 7   | Higgins, J. P., S. G. Thompson, et al. (2003). "Measuring inconsistency in meta-analyses." <i>BMJ</i> 327(7414): 557-560. <a href="https://www.ncbi.nlm.nih.gov/pmc/articles/PMC192859/pdf/3270557.pdf">https://www.ncbi.nlm.nih.gov/pmc/articles/PMC192859/pdf/3270557.pdf</a>                                                                                                                                                                                             | N                     | -                                |
| 8   | Phillippo, D., Ades, T., Dias, S., Palmer, S., Abrams, K. R., & Welton, N. (2016). NICE DSU Technical Support Document 18: methods for population-adjusted indirect comparisons in submissions to NICE. Full list of technical support documents (TSDs)   NICE Decision Support Unit   The University of Sheffield                                                                                                                                                          | Y                     | 28                               |
| 9   | Phillippo, D. M., Dias, S., Elsadat, A., Ades, A. E., & Welton, N. J. (2019). Population adjustment methods for indirect comparisons: a review of national institute for health and care excellence technology appraisals. <i>International journal of technology assessment in health care</i> , 35(3), 221-228. <a href="https://www.ncbi.nlm.nih.gov/pmc/articles/PMC6650293/pdf/EMS83347.pdf">https://www.ncbi.nlm.nih.gov/pmc/articles/PMC6650293/pdf/EMS83347.pdf</a> | Y                     | 69                               |
| 10  | Phillippo, D. M., Dias, S., Ades, A. E., Belger, M., Brnabic, A., Schacht, A., ... & Welton, N. J. (2020). Multilevel network meta-regression for population-adjusted treatment comparisons. <i>Journal of the Royal Statistical Society: Series A (Statistics in Society)</i> , 183(3), 1189-1210. <a href="https://www.ncbi.nlm.nih.gov/pmc/articles/PMC7362893/pdf/RSSA-183-1189.pdf">https://www.ncbi.nlm.nih.gov/pmc/articles/PMC7362893/pdf/RSSA-183-1189.pdf</a>     | Y                     | 946                              |

|    |                                                                                                                                                                                                                                                                                                                                                                                      |   |     |
|----|--------------------------------------------------------------------------------------------------------------------------------------------------------------------------------------------------------------------------------------------------------------------------------------------------------------------------------------------------------------------------------------|---|-----|
| 11 | Sutton, A., Ades, A. E., Cooper, N., & Abrams, K. (2008). Use of indirect and mixed treatment comparisons for technology assessment. <i>Pharmacoeconomics</i> , 26(9), 753-767.                                                                                                                                                                                                      | Y | 254 |
| 12 | Swallow, E., Patterson-Lomba, O., Ayyagari, R., Pelletier, C., Mehta, R., & Signorovitch, J. (2020). Causal inference and adjustment for reference-arm risk in indirect treatment comparison meta-analysis. <i>Journal of Comparative Effectiveness Research</i> , 9(10), 737-750. <a href="https://pubmed.ncbi.nlm.nih.gov/32490682/">https://pubmed.ncbi.nlm.nih.gov/32490682/</a> | Y | 60  |

\*EndNote database of 1,397 references retrieved from PubMed and Embase.com searches, following de-duplication.
